# Supplementary material
Source: HighWire-hosted journal article supplement (https://bjsm.bmj.com/content/56/12/657)

## Delphi Process for Core Outcome Set for Lateral Elbow Tendinopathy (COS-LET): Round 1 Survey Data

---

### Context:

1. There is a high level of heterogeneity in outcome measures used in trials of lateral elbow tendinopathy (LET), which makes evidence synthesis across studies difficult.
2. Previous work in the field of tendinopathy has established through a consensus exercise nine core health-related domains that should be measured in tendinopathy research.
3. The aim of this study is to develop a Core Outcome Set for Lateral Elbow Tendinopathy (COS-LET) mapping to these core domains.

### Methods:

The development of the COS-LET is being developed as per the following process:

1. Systematic review of studies investigating LET has revealed a comprehensive list of all instruments that have previously been used to quantify treatment effect or outcome.
2. These instruments were matched to the list of nine core tendinopathy outcome domains by a Steering Committee of clinicians and researchers with a specialist interest in LET resulting in a set of candidate instruments.
3. A 3-stage international consensus process involving experienced clinicians, researchers and patients will be conducted to determine agreement on what should be the COS-LET.
4. We, including you, have completed the 1<sup>st</sup> stage, which was to respond to a survey.
  - The committee has now collated your responses – reported herein – and then reviewed the psychometric/clinimetric literature to find and rate the available data on the measures you the responders considered should be in a COS-LET.
  - The second stage is where we are at now – the following survey will seek out your responses to a series of questions about including or not measures in a COS-LET.

### Results:

The results of the first survey of healthcare professionals and patients are shown herein in Table 1 and 2, and Figures 1-10. **Table 1** shows the characteristics of the healthcare professionals and patients responding to the survey. **Table 2** is a summary of the results with data representing % agreement for each instrument. **Figures 1-10** illustrates the absolute number and % agreement, disagreement and unsure for each instrument.

In summary, there were four instruments that were above the 70% agreement threshold for inclusion in the COS-LET based on responses from healthcare professionals. Of these instruments, three were also above the 70% agreement threshold based on responses from patients:

- VAS pain on gripping (in the Pain on Activity or Loading Domain)
- Patient-Rated Tennis Elbow Evaluation (in the Disability Domain)
- Quick DASH (in the Disability Domain)

There were a number of instruments that were above the 70% disagreement threshold for inclusion in the COS-LET based on responses from both healthcare professionals and patients: 2 in the Pain on Activity or Loading Domain; 9 in the Disability Domain; 1 in the Quality of Life Domain; and 12 that were not mapped to any of the 9 core health-related domains for tendinopathy. These instruments were subsequently excluded.

There were eight instruments that were not previously included that were listed as important or critical for inclusion. These are highlighted in yellow in Table 1.

**Table 1:** Participant Characteristics (n (%) unless otherwise stated) of those who completed the full survey and provided these details (39 participants commenced, but did not complete).

| Characteristics                                                                          | Healthcare Professionals<br>(N=37) | Patients (N=7)        |
|------------------------------------------------------------------------------------------|------------------------------------|-----------------------|
| Sex: Male                                                                                | 25 (67.6)                          | 2 (28.6)              |
| Age: median (IQR; min-max) years                                                         | 51 (43-57; 34-68)                  | 48 (47.5-54.5; 26-59) |
| Role:                                                                                    |                                    |                       |
| Clinician                                                                                | 2 (5.4)                            |                       |
| Researcher                                                                               | 5 (13.5)                           |                       |
| Clinician Researcher                                                                     | 30 (81.1)                          |                       |
| Not a Clinician or Researcher                                                            |                                    | 7 (100)               |
| Highest academic qualification:                                                          |                                    |                       |
| PhD                                                                                      | 21 (56.8)                          |                       |
| Master                                                                                   | 6 (16.2)                           | 2 (28.6)              |
| Doctor of Medicine                                                                       | 6 (16.2)                           |                       |
| Bachelor                                                                                 | 3 (8.1)                            | 3 (42.9)              |
| Undergraduate Diploma/Certificate                                                        |                                    | 1 (14.3)              |
| Not specified                                                                            | 1 (2.7)                            |                       |
| No university qualification                                                              |                                    | 1 (14.3)              |
| Profession:                                                                              |                                    |                       |
| Physiotherapist                                                                          | 16 (43.2)                          |                       |
| Orthopaedic surgeon                                                                      | 14 (37.8)                          |                       |
| Sports & Exercise Medicine Physician                                                     | 3 (8.1)                            |                       |
| Not specified                                                                            | 3 (8.1)                            |                       |
| Rheumatologist                                                                           | 1 (2.7)                            |                       |
| Patient                                                                                  |                                    | 7 (100%)              |
| Lateral elbow tendinopathy:                                                              |                                    |                       |
| Current history                                                                          | 1 (2.7)                            | 5 (71.4)              |
| Past history                                                                             | 10 (27.0)                          | 4 (57.1)              |
| Country where work:                                                                      |                                    |                       |
| Australia                                                                                | 11 (29.7)                          | 2 (28.6)              |
| United Kingdom                                                                           | 10 (27.0)                          | 5 (71.4)              |
| USA                                                                                      | 3 (8.1)                            |                       |
| Canada and Norway each:                                                                  | 2 (5.4)                            |                       |
| Belgium, Finland, Greece, Israel, Italy, Netherlands,<br>Spain, Sweden, and Turkey each: | 1 (2.7)                            |                       |

**Table 1:** Summary of Round 1 Results: data are % responses, with green representing >70% agree, red >70% disagree, and amber neither green or red.

|                                                | Health Care Professionals<br>(N = 39 <sup>^</sup> ) |           |             | Patients<br>(N = 7) |           |             |
|------------------------------------------------|-----------------------------------------------------|-----------|-------------|---------------------|-----------|-------------|
|                                                | In COS-LET?                                         | Truth (a) | Feasibility | In COS-LET?         | Truth (a) | Feasibility |
| <b>Patient Rating of Condition Domain</b>      |                                                     |           |             |                     |           |             |
| Global Perceived Effect score                  | 56.41                                               | 71.79     | 92.31       | 71.43               | 85.71     | 85.71       |
| Global Rating of Change                        | 64.1                                                | 74.36     | 87.18       | 57.14               | 85.71     | 85.71       |
| Patient Satisfaction Scale                     | 51.28                                               | 64.1      | 89.74       | 71.43               | 85.71     | 85.71       |
| Roles & Maudsley Score                         | Proposed in Survey 1 comments                       |           |             |                     |           |             |
| <b>Participation in Live Activities Domain</b> |                                                     |           |             |                     |           |             |
| Return to sport                                | 38.46                                               | 64.1      | 82.05       | 71.43               | 71.42     | 85.71       |
| Time off work                                  | 53.85                                               | 79.49     | 76.92       | 57.14               | 57.14     | 85.71       |
| Total Elbow Scoring System                     | 30.77                                               | 35.9      | 53.85       | 57.14               | 57.14     | 71.43       |
| OSTRC Question 1                               | Proposed in Survey 1 comments                       |           |             |                     |           |             |
| <b>Pain on Activity or Loading Domain</b>      |                                                     |           |             |                     |           |             |
| Tennis Elbow Functional Scale*                 | 28.21                                               | 61.54     | 56.41       | 85.71               | 85.71     | 85.71       |
| Thomsen Test                                   | 35.9                                                | 71.79     | 71.79       | 71.43               | 71.43     | 85.71       |
| VAS chair pick-up                              | 23.08                                               | 51.28     | 58.97       | 28.57               | 85.71     | 57.14       |
| VAS pain during activity                       | 79.49                                               | 89.74     | 87.18       | 57.14               | 71.43     | 85.71       |
| VAS pain during elbow movement                 | 17.95                                               | 33.33     | 69.23       | 28.57               | 42.86     | 85.71       |
| VAS pain on gripping                           | 71.79                                               | 94.87     | 89.74       | 71.43               | 71.43     | 100         |
| VAS pain at work                               | 38.46                                               | 58.97     | 74.36       | 42.86               | 42.86     | 57.14       |
| Pain-Free Functional Index                     | 17.95                                               | 51.28     | 58.97       | 42.86               | 42.86     | 85.71       |
| Patient-Rated Tennis Elbow Evaluation*         | 61.54                                               | 79.49     | 71.79       | 100                 | 100       | 100         |
| <b>Function Domain</b>                         |                                                     |           |             |                     |           |             |
| Patient Specific Functional Scale              | 28.95                                               | 63.16     | 52.63       | 71.43               | 85.71     | 85.71       |
| Upper Extremity Functional Scale               | 44.74                                               | 68.42     | 68.42       | 57.14               | 57.14     | 100         |
| VAS function                                   | 44.74                                               | 63.16     | 76.32       | 28.57               | 42.86     | 57.14       |
| Patient-Rated Tennis Elbow Evaluation*         | Proposed in Survey 1 comments                       |           |             |                     |           |             |
| <b>Psychological Factors Domain</b>            |                                                     |           |             |                     |           |             |
| Hospital Anxiety and Depression Scale          | 36.84                                               | 52.63     | 50          | 28.57               | 28.57     | 85.71       |
| Tampa Scale of Kinesophobia                    | 39.47                                               | 50        | 55.26       | 71.43               | 85.71     | 71.43       |
| State-Trait Anxiety Inventory                  | Proposed in Survey 1 comments                       |           |             |                     |           |             |
| Nottingham Health Profile                      | Proposed in Survey 1 comments                       |           |             |                     |           |             |
| <b>Physical Function Capacity Domain</b>       |                                                     |           |             |                     |           |             |
| Grip strength (maximum)*                       | 47.37                                               | 81.58     | 68.42       | 85.71               | 85.71     | 100         |
| Pain free grip strength*                       | 65.79                                               | 78.95     | 71.05       | 85.71               | 85.71     | 100         |
| Elbow ROM                                      | 10.53                                               | 31.58     | 65.79       | 42.86               | 28.57     | 100         |

| <b>Disability Domain</b>                                            |                               |       |       |  |       |       |       |
|---------------------------------------------------------------------|-------------------------------|-------|-------|--|-------|-------|-------|
| Andrews-Carson Score                                                | 0                             | 7.89  | 26.32 |  | 14.29 | 14.29 | 42.86 |
| American Shoulder & Elbow Score                                     | 10.53                         | 44.74 | 34.21 |  | 42.86 | 42.86 | 71.43 |
| Broberg & Morrey Rating System                                      | 2.63                          | 21.05 | 26.32 |  | 28.57 | 42.86 | 71.43 |
| Disabilities of the Arm Shoulder and Hand*                          | 39.47                         | 68.42 | 44.74 |  | 57.14 | 57.14 | 71.43 |
| HAND10                                                              | 7.89                          | 44.74 | 60.53 |  | 57.14 | 57.14 | 85.71 |
| Japanese Orthopaedic Association Elbow Score                        | 10.53                         | 44.74 | 42.11 |  | 0     | 0     | 57.14 |
| Laitinen Questionnaire                                              | 13.16                         | 36.84 | 39.47 |  | 14.29 | 14.29 | 57.14 |
| Liverpool Elbow Score                                               | 2.63                          | 34.21 | 34.21 |  | 28.57 | 42.86 | 42.86 |
| Mayo Elbow Performance Score                                        | 7.89                          | 31.58 | 39.47 |  | 0     | 0     | 28.57 |
| Nirschl Tennis Elbow Score                                          | 18.42                         | 57.89 | 55.26 |  | 57.14 | 57.14 | 57.14 |
| Nottingham Health Profile                                           | 2.63                          | 15.79 | 31.58 |  | 0     | 0     | 0     |
| Oxford Elbow Score*                                                 | 23.68                         | 52.63 | 55.26 |  | 57.14 | 71.43 | 85.71 |
| Patient-Rated Wrist Evaluation Questionnaire                        | 13.16                         | 44.74 | 50.00 |  | 57.14 | 57.14 | 85.71 |
| Patient-Rated Tennis Elbow Evaluation*                              | 73.68                         | 92.11 | 86.84 |  | 85.71 | 85.71 | 85.71 |
| Quick DASH*                                                         | 71.05                         | 76.32 | 81.58 |  | 100   | 100   | 100   |
| Total Elbow Scoring System                                          | 10.53                         | 36.84 | 52.63 |  | 28.57 | 28.57 | 57.14 |
| Roles & Maudsley Score                                              | 5.26                          | 28.95 | 57.89 |  | 14.29 | 28.57 | 57.14 |
| <b>Quality of Life Domain</b>                                       |                               |       |       |  |       |       |       |
| EuroQoL (EQ5D)                                                      | 51.35                         | 59.46 | 67.57 |  | 57.14 | 57.14 | 85.71 |
| Short Form Survey (SF-36)                                           | 16.22                         | 62.16 | 24.32 |  | 14.29 | 71.43 | 28.57 |
| SF-12 Health Survey (SF-12)                                         | 40.54                         | 67.57 | 67.57 |  | 42.86 | 71.43 | 57.14 |
| Nottingham Health Profile                                           | Proposed in Survey 1 comments |       |       |  |       |       |       |
| World Health Organization Quality of Life Instruments (WHOQOL-BREF) | Proposed in Survey 1 comments |       |       |  |       |       |       |
| Short Musculoskeletal Function Assessment                           | Proposed in Survey 1 comments |       |       |  |       |       |       |
| <b>Pain Over a Specified Timeframe Domain</b>                       |                               |       |       |  |       |       |       |
| VAS night pain                                                      | 37.84                         | 70.27 | 86.49 |  | 28.57 | 57.14 | 85.71 |
| VAS pain defined time period                                        | 67.57                         | 81.08 | 78.38 |  | 28.57 | 42.86 | 71.43 |
| VAS pain at rest                                                    | 56.76                         | 67.57 | 83.78 |  | 14.29 | 28.57 | 71.43 |
| Tennis Elbow Functional Scale*                                      | 21.62                         | 59.46 | 56.76 |  | 85.71 | 85.71 | 85.71 |
| <b>Others</b>                                                       |                               |       |       |  |       |       |       |
| Analgesic use                                                       | 43.24                         |       |       |  | 14.29 |       |       |
| Canadian Occupational Performance Measure                           | 5.41                          |       |       |  | 14.29 |       |       |
| Cold Pain Threshold                                                 | 8.11                          |       |       |  | 14.29 |       |       |
| Electromyography                                                    | 0                             |       |       |  | 28.57 |       |       |
| Gothenburg Quality of Life Instrument                               | 0                             |       |       |  | 0     |       |       |
| MRI evaluation                                                      | 8.11                          |       |       |  | 14.29 |       |       |

|                                                                                 |       |  |  |       |  |  |
|---------------------------------------------------------------------------------|-------|--|--|-------|--|--|
| Orthopaedic Research Institute-Tennis Elbow Testing System                      | 2.7   |  |  | 14.29 |  |  |
| Placzek Score                                                                   | 10.81 |  |  | 28.57 |  |  |
| Pressure Pain Threshold                                                         | 18.92 |  |  | 14.29 |  |  |
| Ultrasound Appearance                                                           | 10.81 |  |  | 14.29 |  |  |
| University of Peloponnese Pain, Functionality and Quality of Life Questionnaire | 2.7   |  |  | 14.29 |  |  |
| VAS pain on palpation                                                           | 10.81 |  |  | 28.57 |  |  |
| VAS pain overall                                                                | 24.32 |  |  | 28.57 |  |  |
| Work Limitations Questionnaire                                                  | 5.41  |  |  | 57.14 |  |  |

<sup>^</sup> 39 responders completed the first 3 domains, 38 continued on to the next 4 domains and 37 completed it all

\*indicates the measures that had clinimetric data/study(ies) with a score of at least 40%.

**Figure 1: Participant response for Patient Rating of Condition Domain**

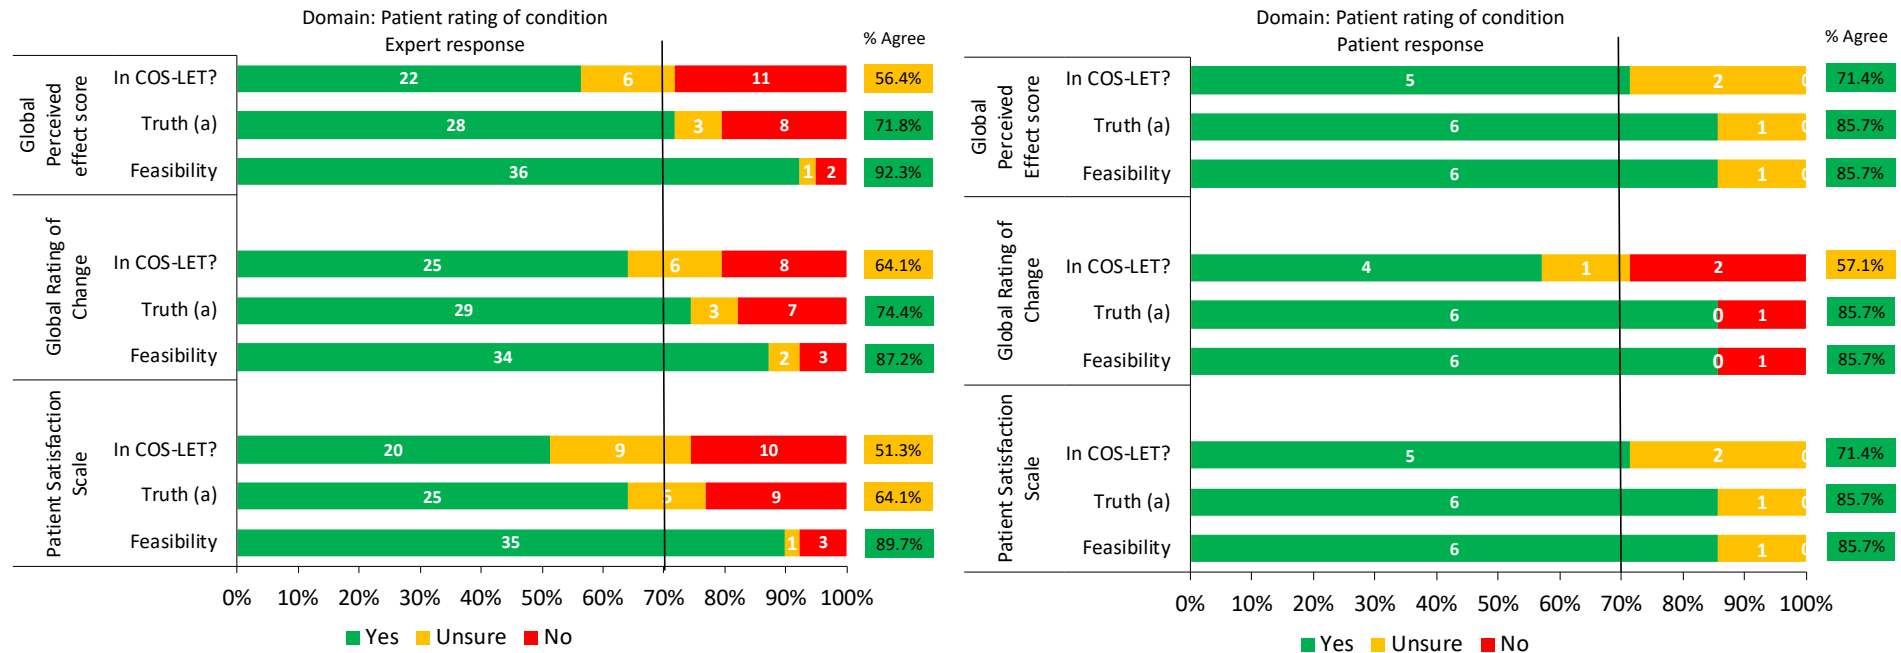

**Figure 2: Participant response for Participation in Life Activities Domain**

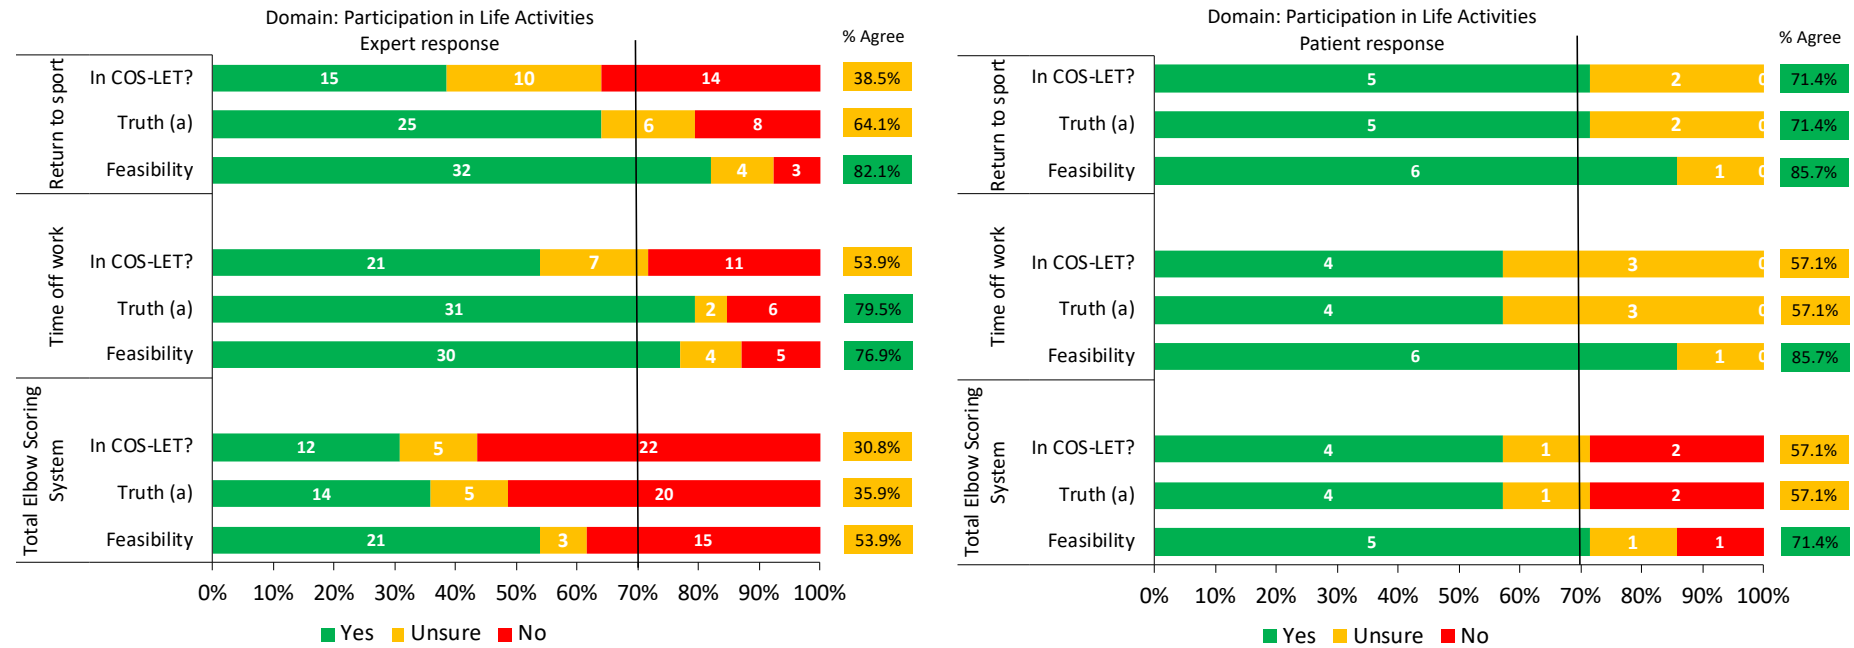



**Figure 3: Participant response for Pain on Activity or Loading Domain**

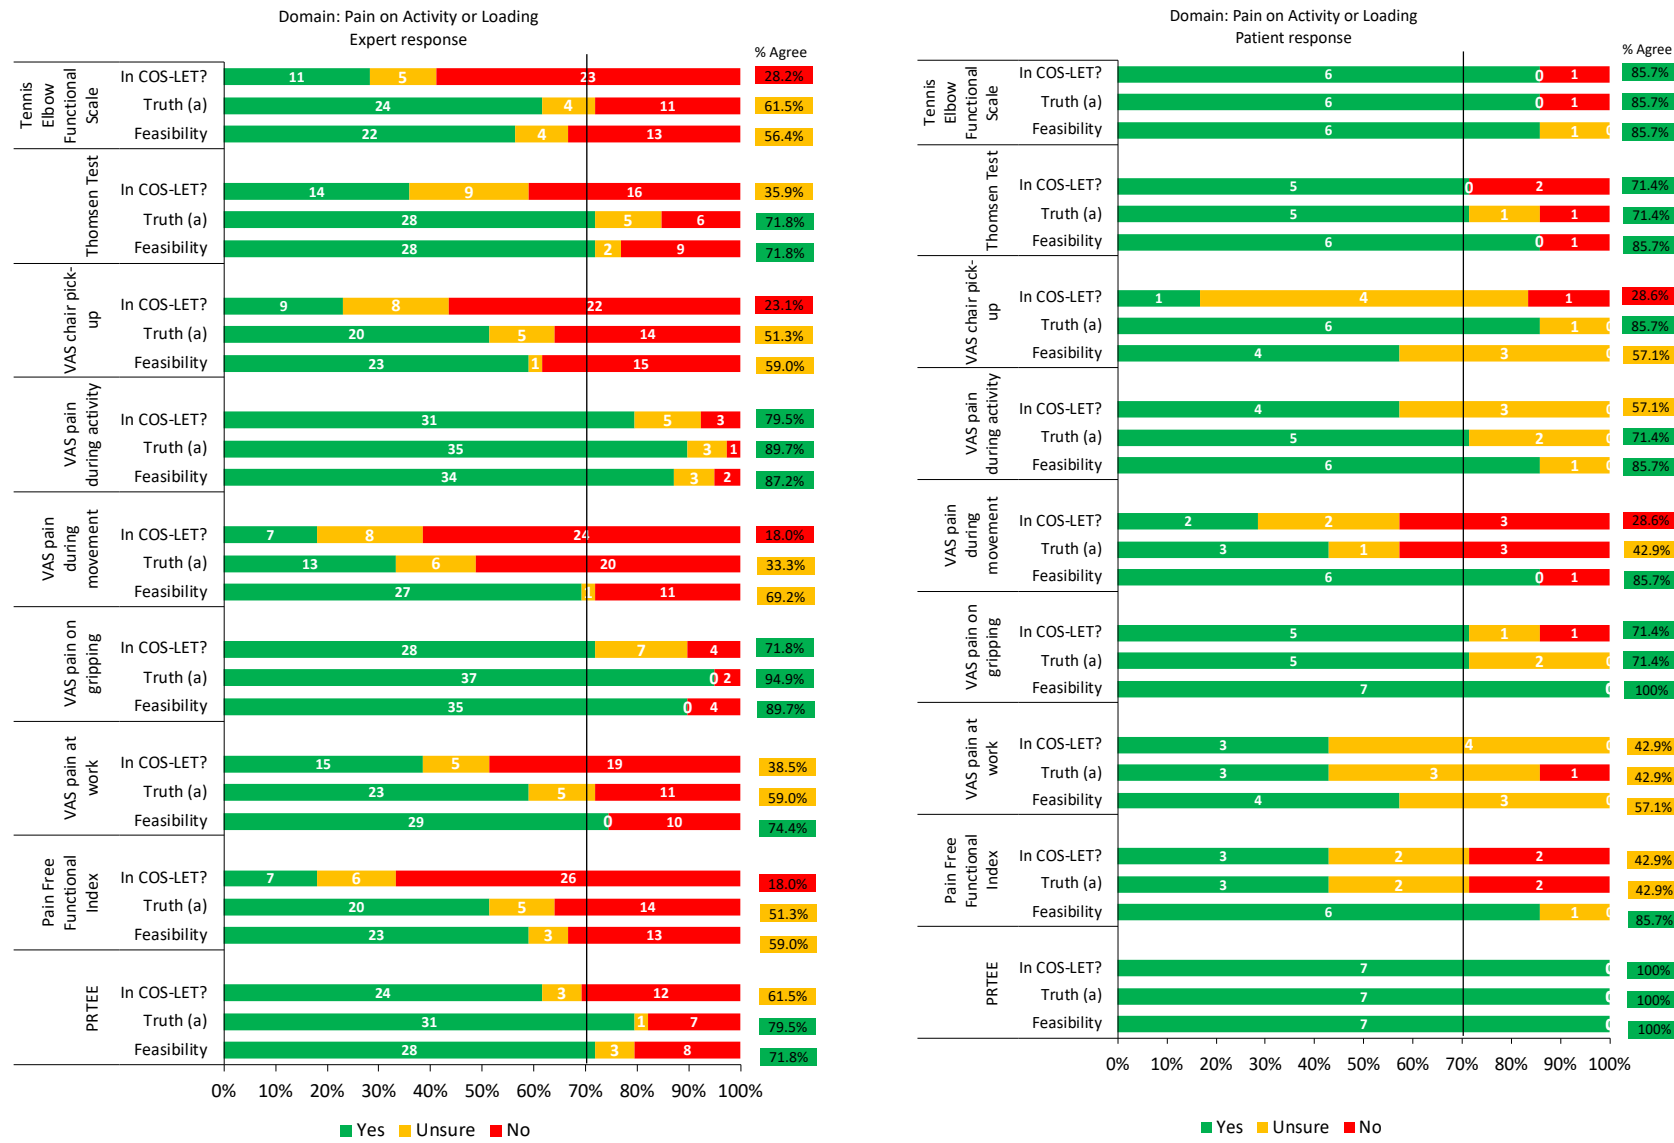

**Figure 4: Participant response for Function Domain**

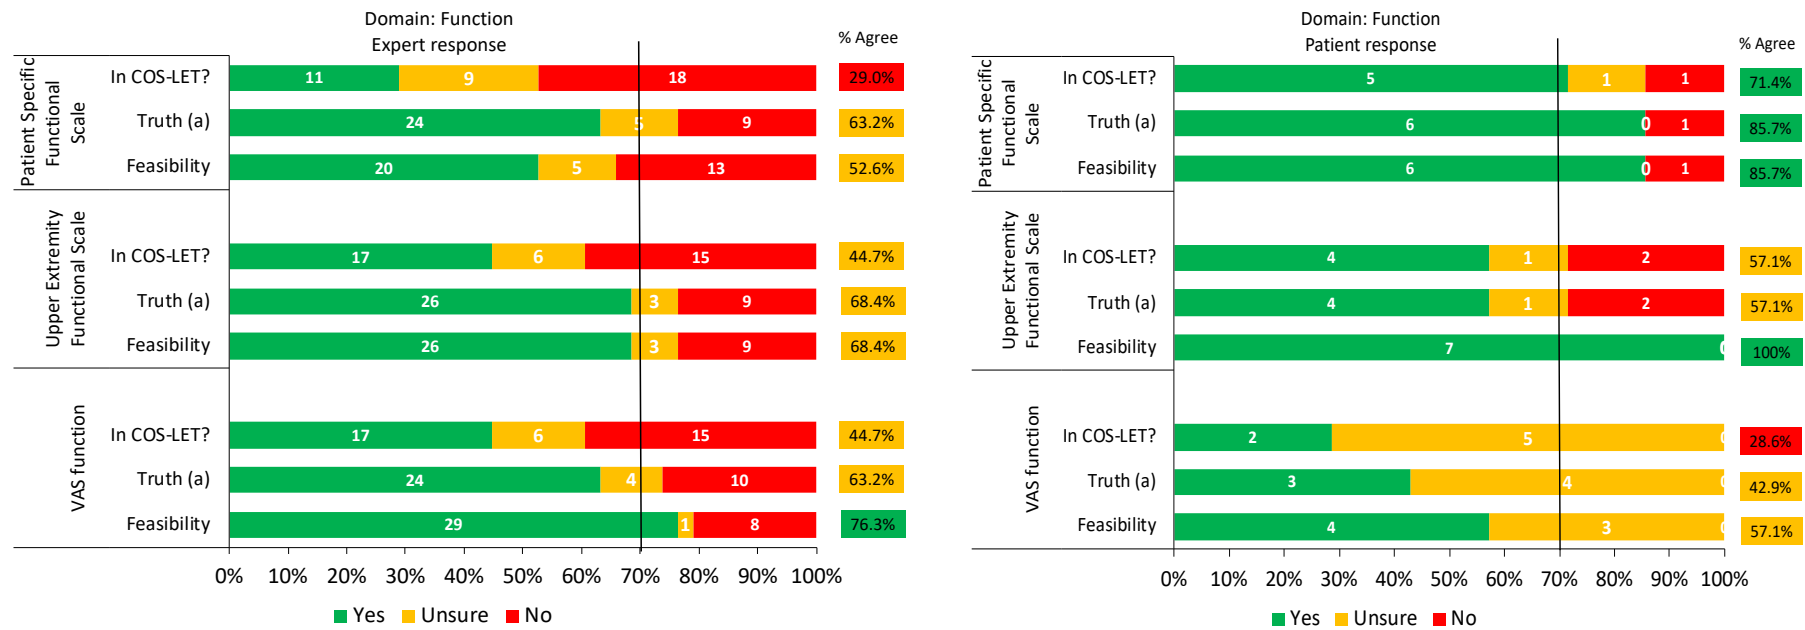

**Figure 5: Participant response for Psychological Factors Domain**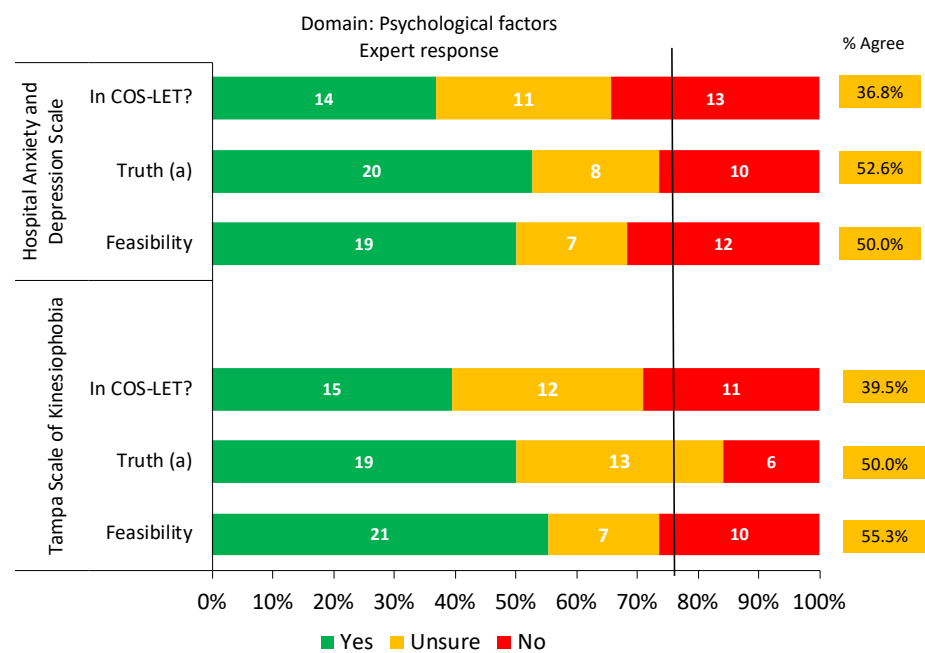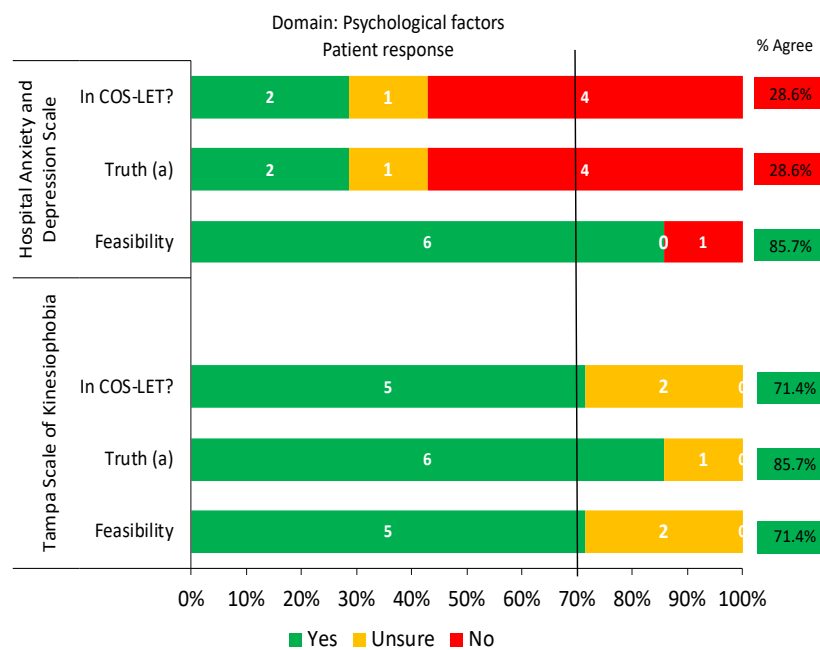

**Figure 6: Participant response for Physical Function Capacity Domain**

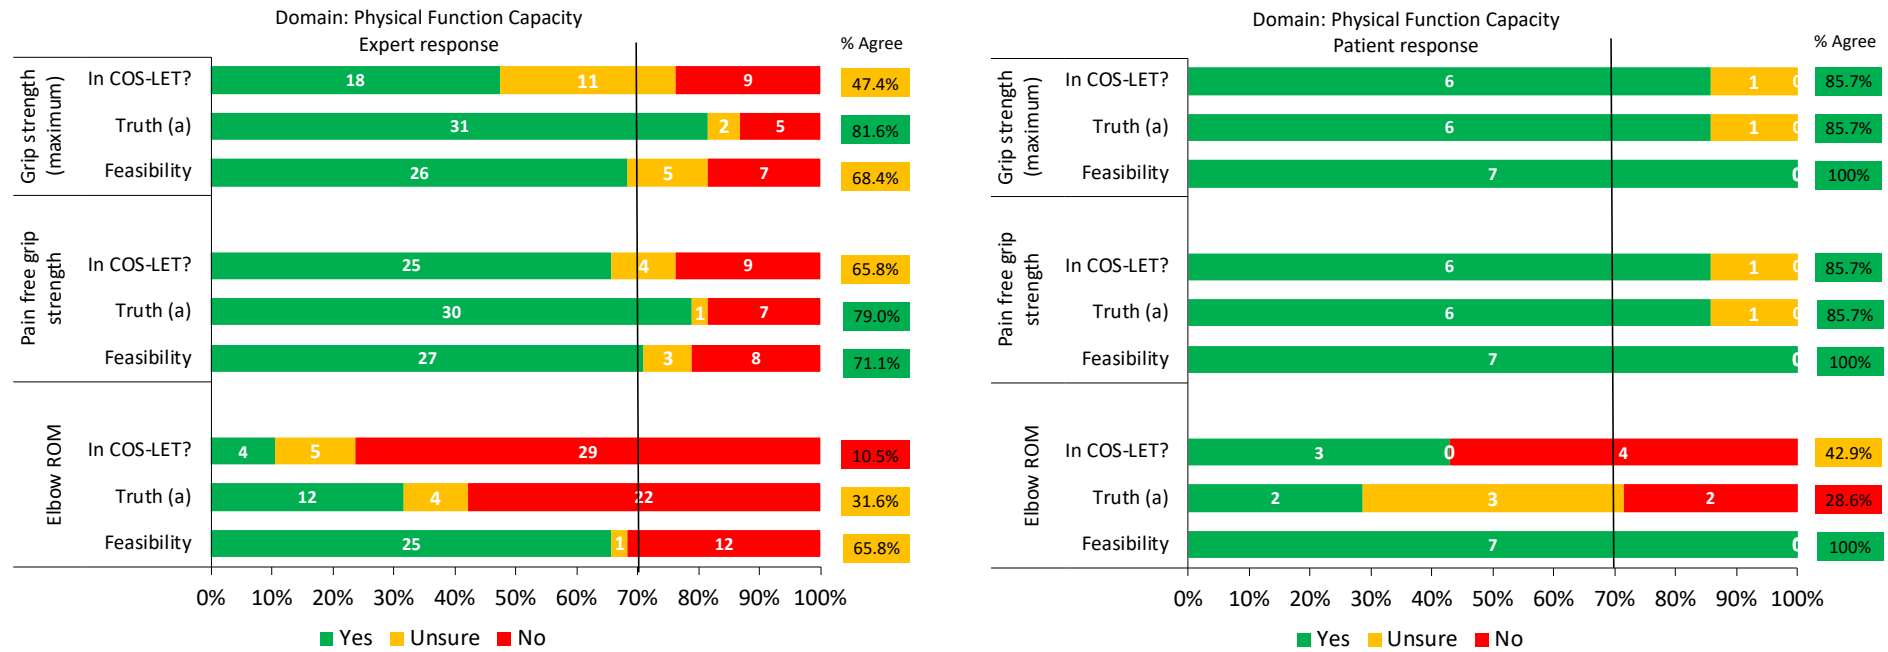

**Figure 7: Participant response for Disability Domain**

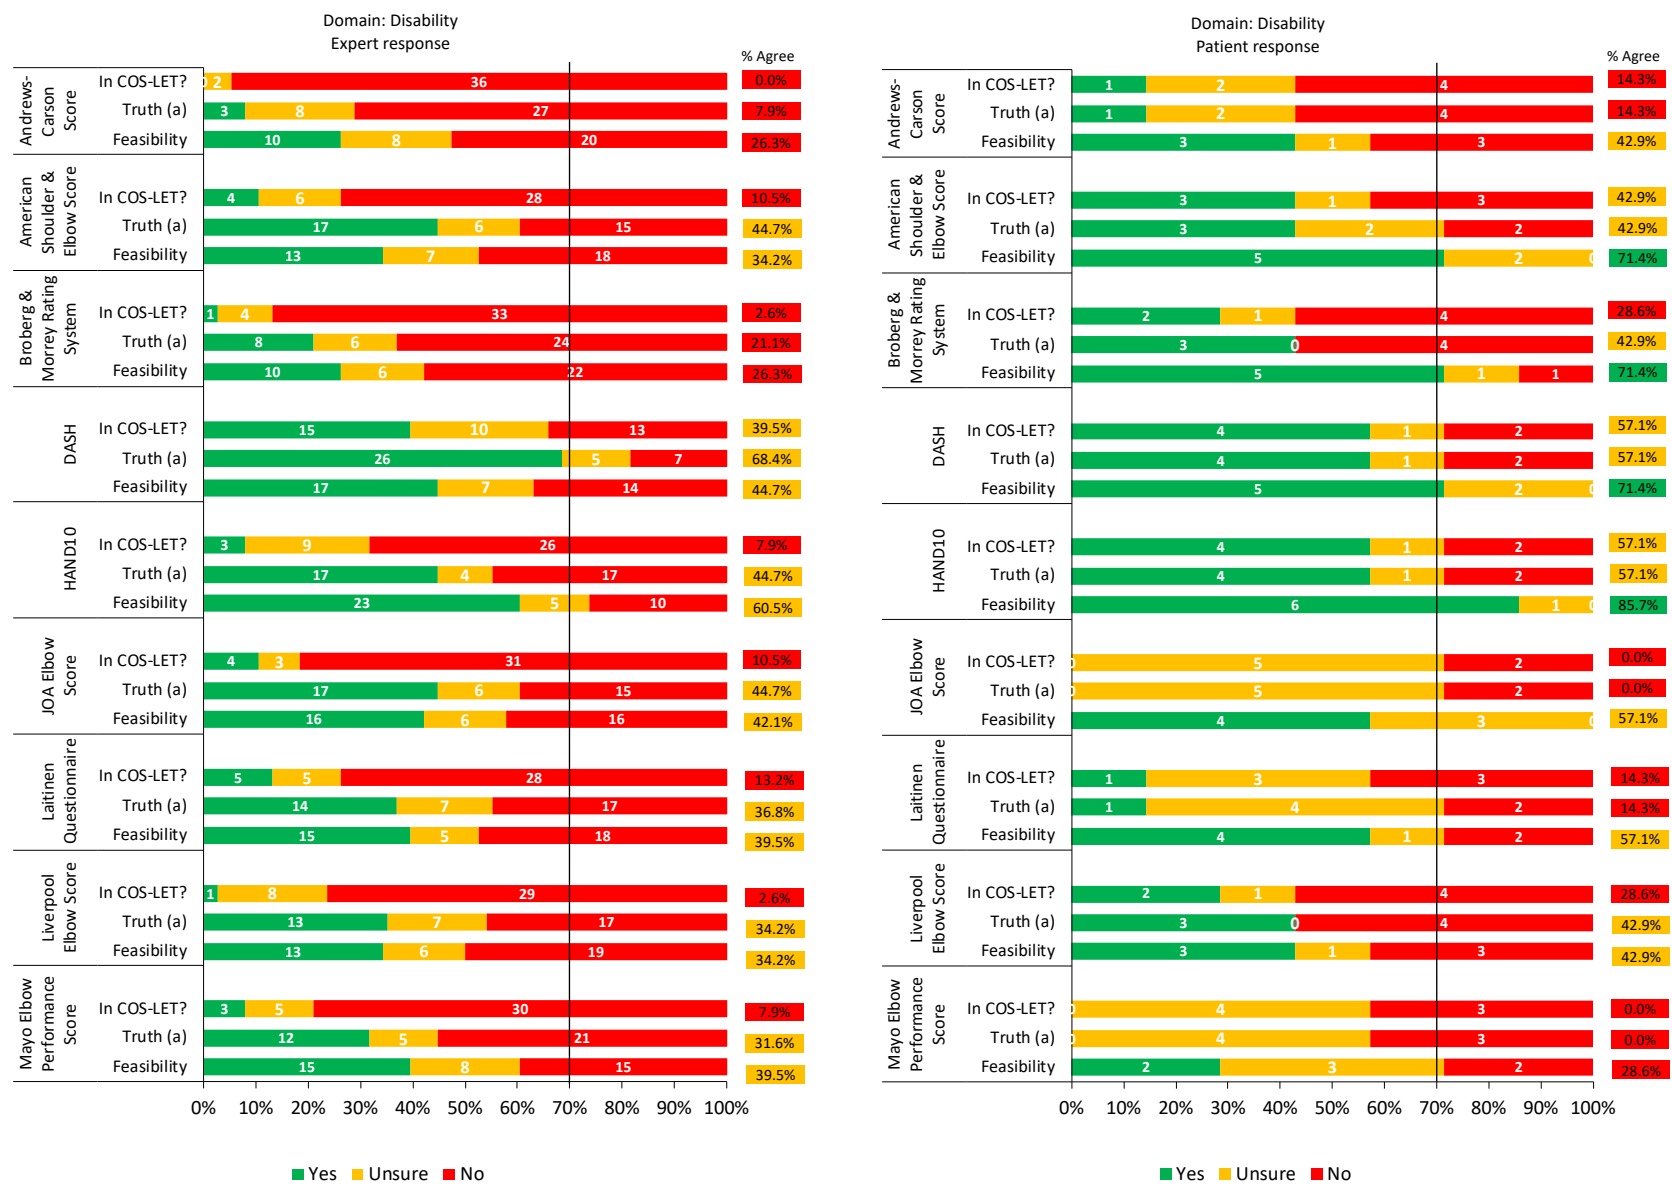

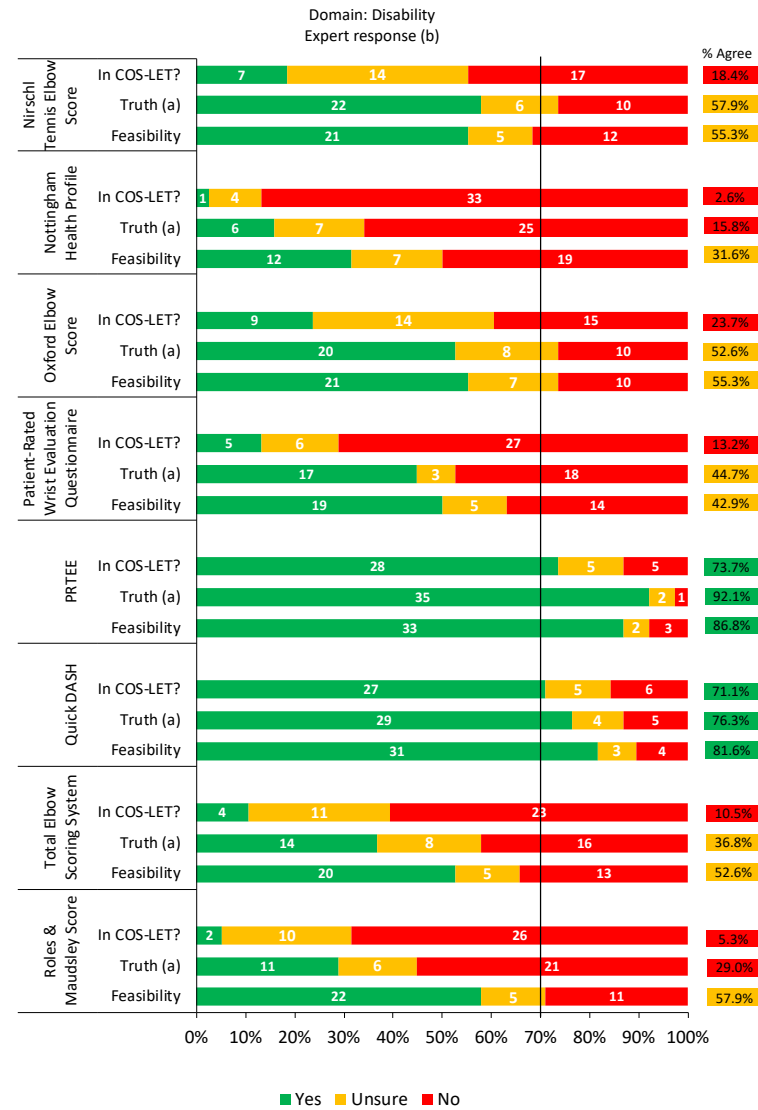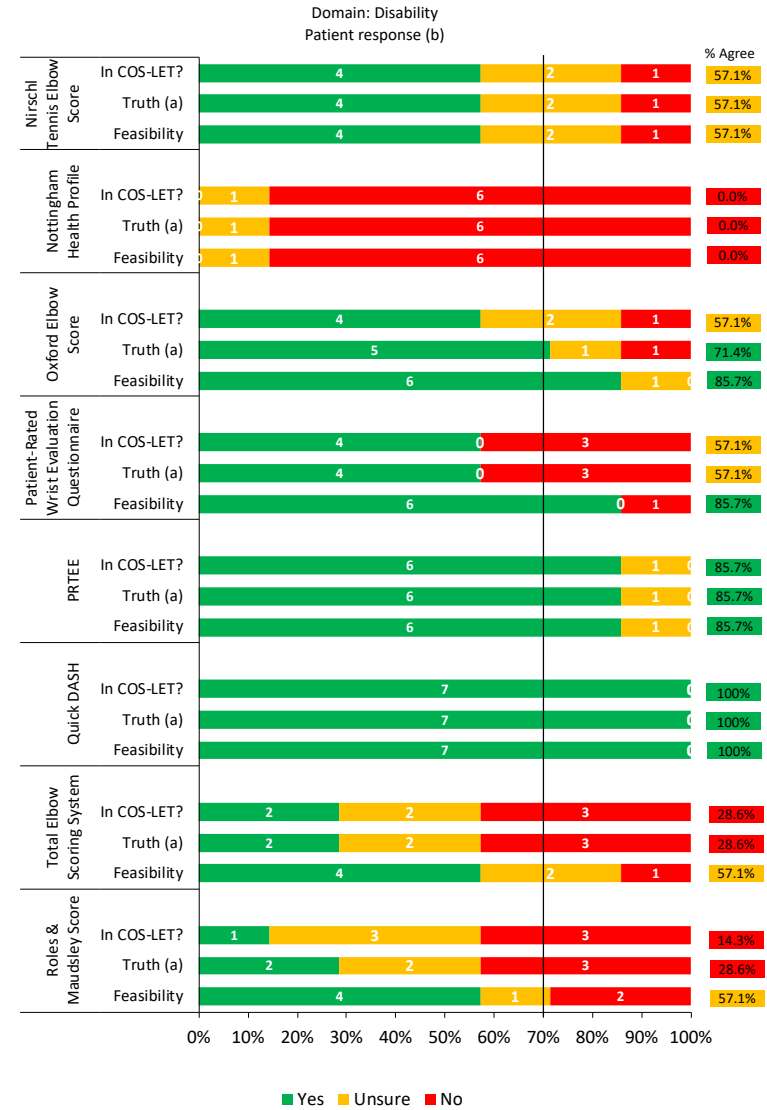

**Figure 8:** Participant response for **Quality of Life** Domain

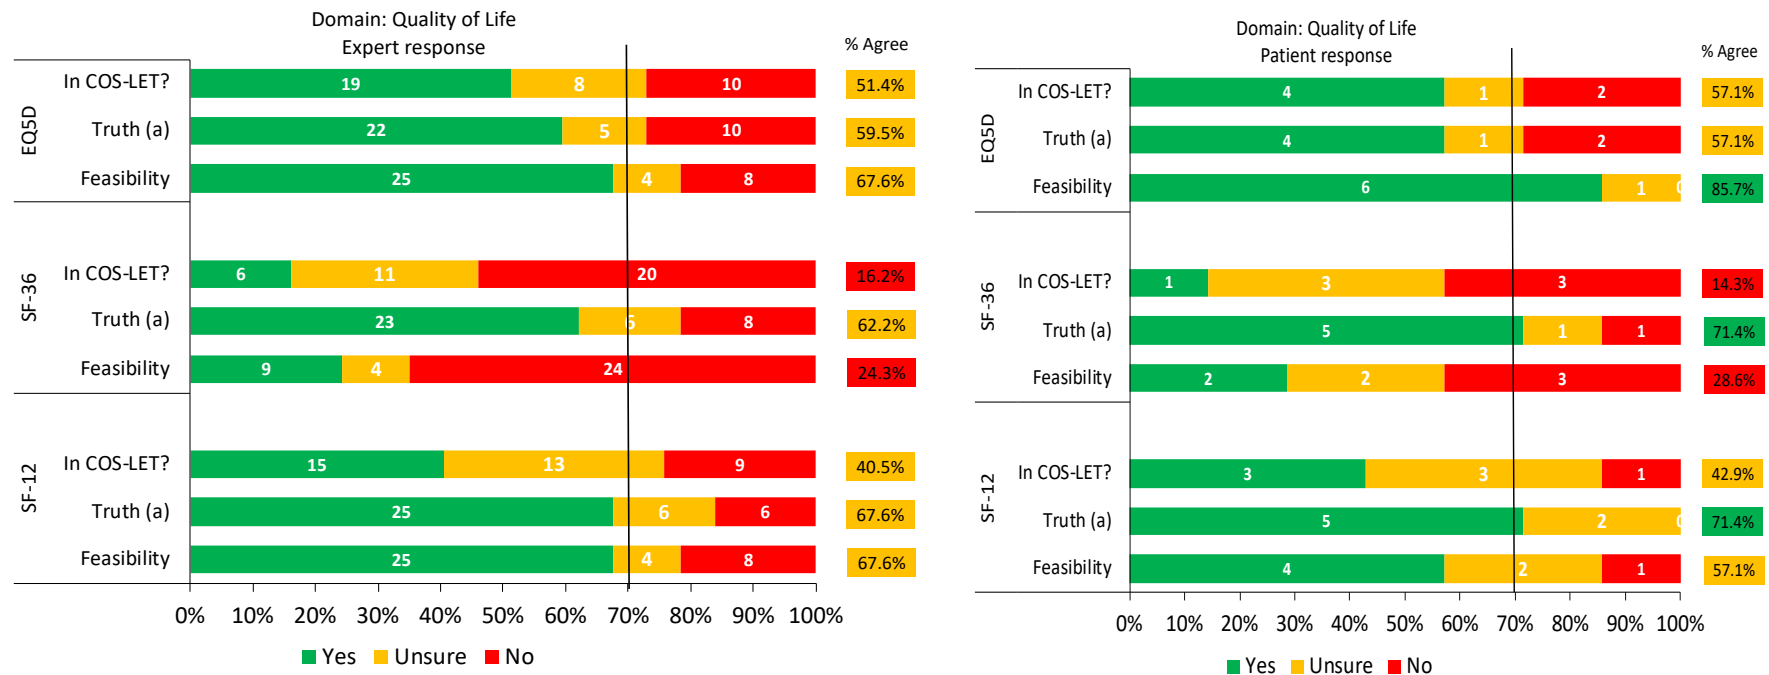

Figure 9: Participant response for Pain Over a Specified Time Domain

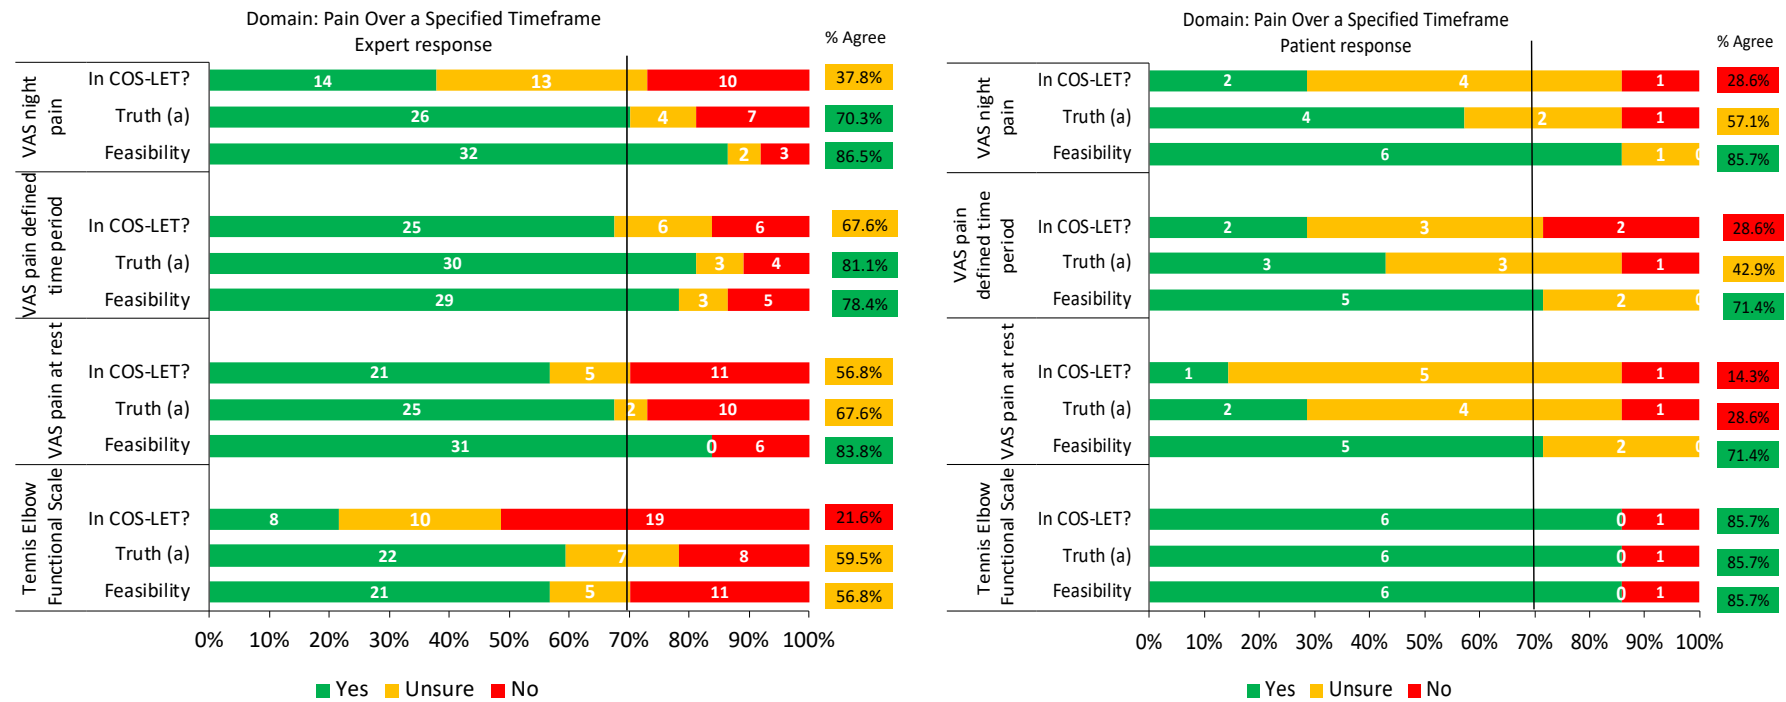



**Figure 10: Other outcome measures**

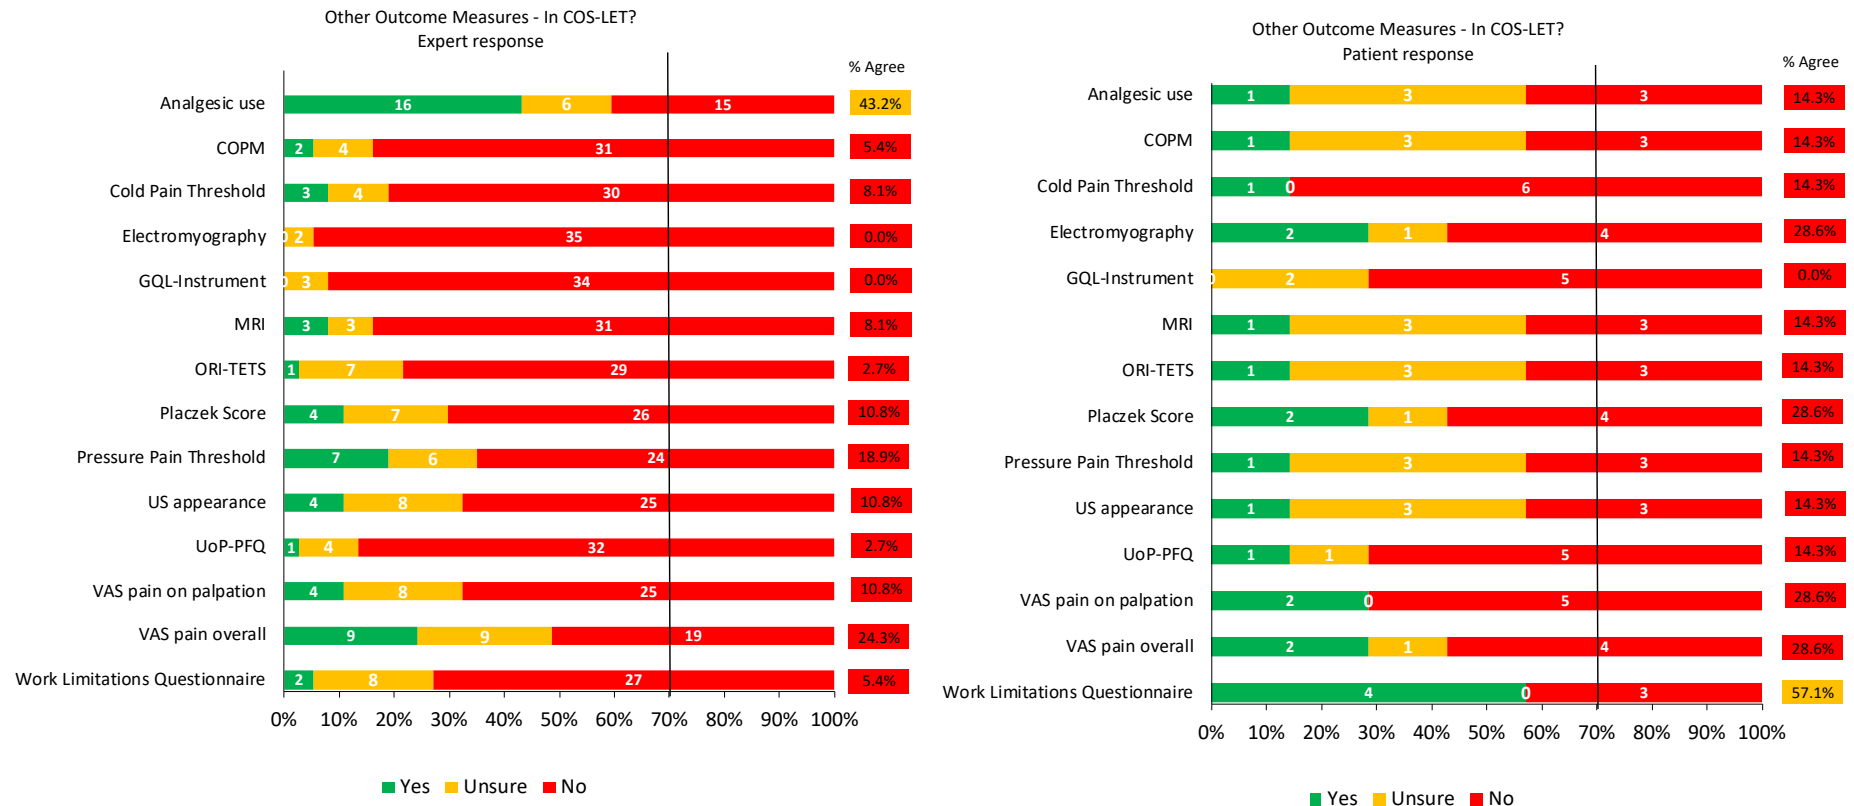

Supplement: inline-supplementary-material-1 [file inline-supplementary-material-1.pdf]
